# Supplementary material for: Argonaute2 Is Essential for Mammalian Gastrulation and Proper Mesoderm Formation
Source: PubMed Central journal article supplement (PMC2323323; doi:10.1371/journal.pgen.0030227), 2007-12-28

Supporting Figure 1

The homozygous disruption of *Ago2* results in a variable expansion of T expression. (A-C)

Whole-mount in situ hybridization using an antisense probe against T on e7.5 wild-type (A) and *Ago2*<sup>-/-</sup> (B,C) embryos.

The *Ago2*<sup>-/-</sup> embryos exhibit an expansion of the primitive streak (block-arrow). The expansion can be classified as either partial (B; 9/17 *Ago2*<sup>-/-</sup> mutants) or profound (C; 8/17 *Ago2*<sup>-/-</sup> mutants). The scale bar represents 200  $\mu$ m.

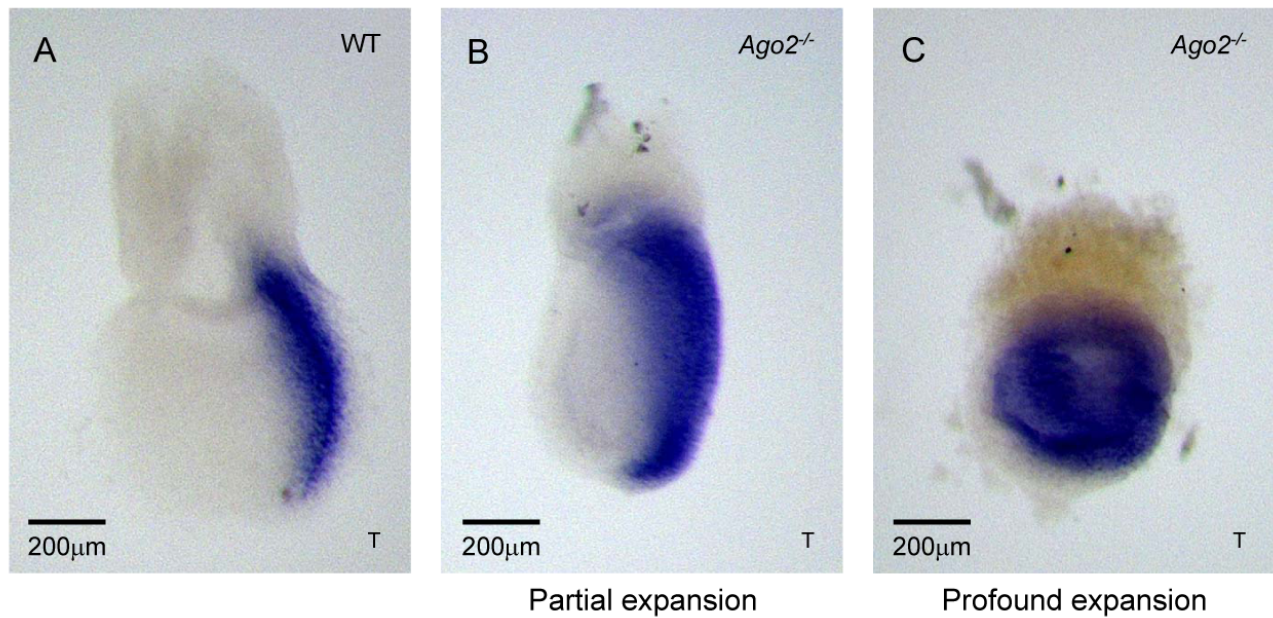

Supplement: pgen.0030227.sg001.pdf [file pgen.0030227.sg001.pdf]
